# Supplementary material for: Spatio-temporal epidemiology of the cholera outbreak in Papua New Guinea, 2009–2011
Source: PubMed Central journal article supplement (PMC4158135; doi:10.1186/1471-2334-14-449), 2014-08-20

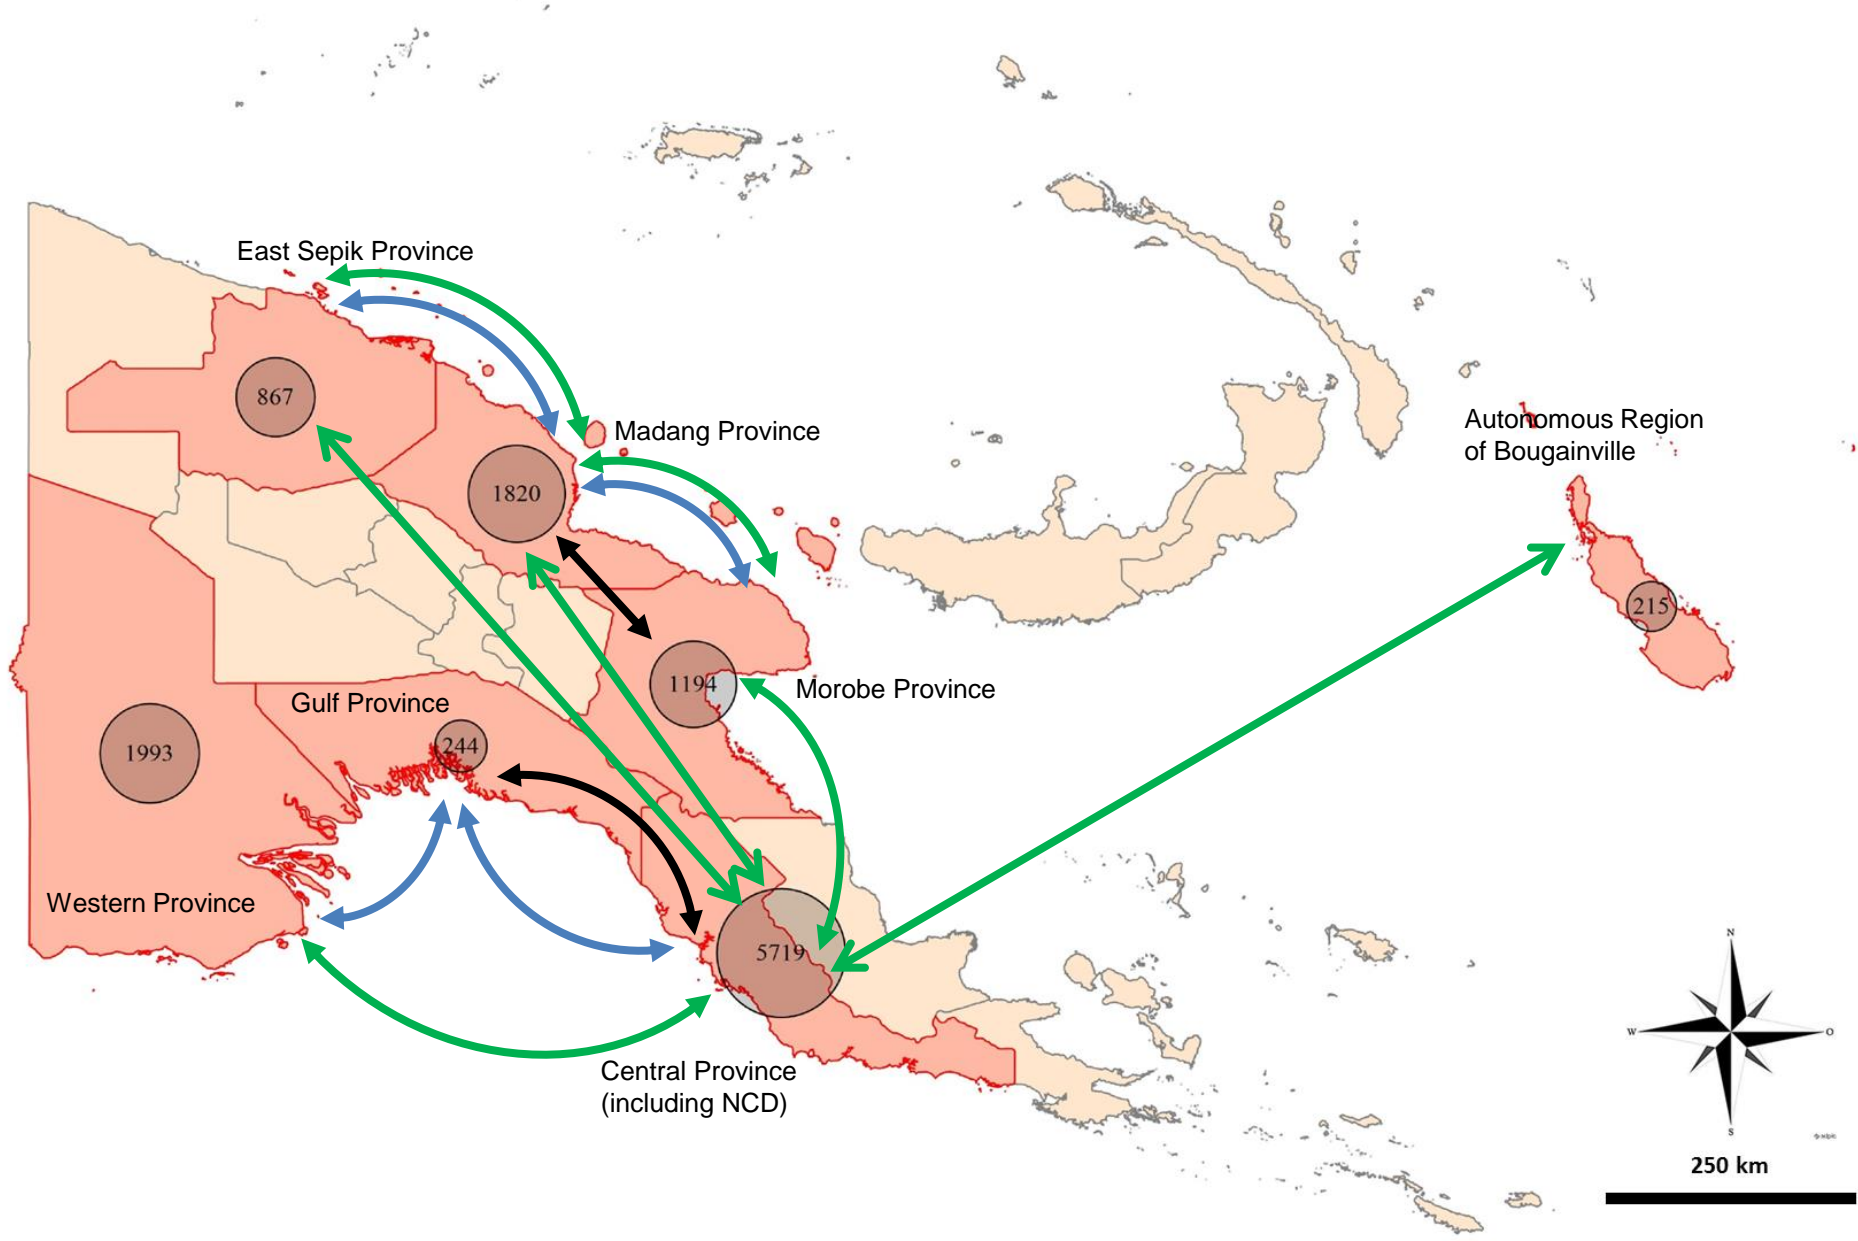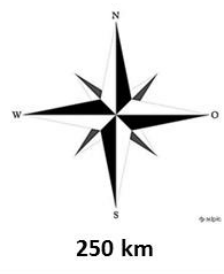

Supplement: 12879_2014_3761_MOESM4_ESM.pdf [file 12879_2014_3761_MOESM4_ESM.pdf]
